# Supplementary material
Source: publisher figshare collection journal article supplement (https://karger.figshare.com/articles/dataset/_/4265366)
Supplement: Supplementary file 1 [file 1]

Archive with 3 entries (3 files):
- Supplement_legende.doc
- MNP_201502006_1_3.pdf
- MNP_201502006_1_4.pdf
